# Supplementary material
Source: HighWire-hosted journal article supplement (http://www.cfp.ca/highwire/filestream/30247/field_highwire_adjunct_files/2/Male_Preventive_Care_Checklist_Form.pdf)
Supplement: Male_Preventive_Care_Checklist_Form.pdf [file Male_Preventive_Care_Checklist_Form.pdf]

# Preventive Care Checklist Form<sup>®</sup>

## For average-risk, routine, male health assessments

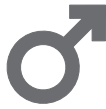

Developed by: Dr. V. Dubey, Dr. R. Mathew, Dr. K. Iglar

**Please note:**

**Bold** = Good evidence (from the Canadian Task Force on Preventive Health Care)  
*Italics* = Fair evidence (from the Canadian Task Force on Preventive Health Care)  
 Plain text = Guidelines (from other Canadian sources)  
 (See reverse for references, insert for explanations)

Name:

Sex:

DOB:

Age:

Health Card:

Tel:

Address:

Date:

### Current Concerns

### Lifestyle/Habits

Diet:

*Fat / Cholesterol*

Fiber

*Calcium*

Sodium

*Smoking:*

*Alcohol:*

Drugs:

*Sexual History:*

Exercise:

Work:

Family Planning/  
Contraception:

Family:

Sleep:

Relationships:

### Update Cumulative Patient Profile

Family History

Medications

Hospitalizations/Surgeries

Allergies

### Functional Inquiry

|                  | Normal                   | Remarks |
|------------------|--------------------------|---------|
| HEENT:           | <input type="checkbox"/> |         |
| CVS:             | <input type="checkbox"/> |         |
| Resp:            | <input type="checkbox"/> |         |
| GI:              | <input type="checkbox"/> |         |
| GU:              | <input type="checkbox"/> |         |
| Sexual Function: | <input type="checkbox"/> |         |

|                    | Normal                   | Remarks                                                                                                    |
|--------------------|--------------------------|------------------------------------------------------------------------------------------------------------|
| MSK:               | <input type="checkbox"/> |                                                                                                            |
| Neuro:             | <input type="checkbox"/> |                                                                                                            |
| Derm:              | <input type="checkbox"/> |                                                                                                            |
| Mental Health:     | <input type="checkbox"/> | <i>Depression screen</i> <input type="checkbox"/> <i>positive</i> <input type="checkbox"/> <i>negative</i> |
| Constitutional SX: | <input type="checkbox"/> |                                                                                                            |

Education/  
Counseling

### Behavioural

- adverse nutritional habits*
- dietary advice on fat/cholesterol (30-69 yrs)*
- adequate calcium intake (1000 to 1500 mg/d)<sup>1</sup>
- adequate vitamin D (200 IU in 50-64, 400-800 IU in ≥ 65 yr)<sup>1</sup>
- regular, moderate physical activity*
- weight loss counseling if overweight*
- avoid sun exposure, use protective clothing*
- safe sex practices/STD counseling*

### Smoking

Yes  No

- smoking cessation**
- nicotine replacement therapy**
- dietary advice on fruits and green leafy vegetables*
- referral to validated smoking cessation program*

For general population  
unless otherwise stated

### Alcohol

Yes  No

- case finding for problem drinking*
- counseling for problem drinking*

### Elderly

Yes  No

- cognitive assessment**  
(if concerns)
- fall assessment** (if history of falls)

### Oral Hygiene

- brushing/flossing teeth**
- fluoride (toothpaste/supplement)**
- tooth scaling and prophylaxis*
- smoking cessation**

### Personal Safety

- hearing protection**
- noise control programs**
- seat belts**

### Parents with children

Yes  No

- poison control prevention*
- smoke detectors*
- non-flammable sleepwear*
- hot water thermostat settings (<54°C)*

**Disclaimer:** This form is a guide to the adult periodic health examination. Last updated January 2007. The recommendations are for average-risk adults.

Endorsed by:

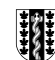

The College of  
Family Physicians  
of Canada

Le Collège des  
médecins de famille  
du Canada

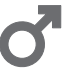

**Please note:**

**Bold** = Good evidence (from the Canadian Task Force on Preventive Health Care)  
*Italics* = Fair evidence (from the Canadian Task Force on Preventive Health Care)  
Plain text = Guidelines (from other Canadian sources) (See insert for explanations)

Name: \_\_\_\_\_

**Physical Examination**

HR: \_\_\_\_\_ BP: \_\_\_\_\_ RR: \_\_\_\_\_ HT: \_\_\_\_\_ WT: \_\_\_\_\_ BMI: \_\_\_\_\_  
Waist Circumference: \_\_\_\_\_ Ratio: \_\_\_\_\_  
Hip Circumference: \_\_\_\_\_

Eyes: \_\_\_\_\_ Snellen sight card: R \_\_\_\_\_  
L \_\_\_\_\_

Abdo: \_\_\_\_\_

Nose: \_\_\_\_\_ Ano-Rectum: \_\_\_\_\_

Ears: \_\_\_\_\_ whispered voice test: R \_\_\_\_\_  
L \_\_\_\_\_

Genitalia: \_\_\_\_\_

Mouth/Throat: \_\_\_\_\_ Neuro: \_\_\_\_\_

Neck/Thyroid: \_\_\_\_\_ Derm: \_\_\_\_\_

CVS: \_\_\_\_\_ MSK/Joints: \_\_\_\_\_

Resp: \_\_\_\_\_ Extremities: \_\_\_\_\_

| Age                 | 21-64 years                                                                                                                                                                                                                                                                                                                                                                                                                                                                                                                                 | ≥ 65 years                                                                                                                                                                                                                                                                                                                                                                                                                                                                                               |
|---------------------|---------------------------------------------------------------------------------------------------------------------------------------------------------------------------------------------------------------------------------------------------------------------------------------------------------------------------------------------------------------------------------------------------------------------------------------------------------------------------------------------------------------------------------------------|----------------------------------------------------------------------------------------------------------------------------------------------------------------------------------------------------------------------------------------------------------------------------------------------------------------------------------------------------------------------------------------------------------------------------------------------------------------------------------------------------------|
| Labs/Investigations | <input type="checkbox"/> Hemocult multiphase q1-2 years (age ≥50)<br>OR <input type="checkbox"/> Sigmoidoscopy OR <input type="checkbox"/> Colonoscopy<br><input type="checkbox"/> Gonorrhea/Chlamydia/Syphilis/HIV/HBV <sup>5</sup> screen (high risk)<br><input type="checkbox"/> Fasting Lipid Profile (≥40 yr or sooner if at risk) <sup>2</sup><br><input type="checkbox"/> Fasting Blood Glucose, at least q3 yrs (≥40 yr or sooner if at risk) <sup>3</sup><br><input type="checkbox"/> Bone Mineral Density if at risk <sup>1</sup> | <input type="checkbox"/> Hemocult Multiphase q1-2 years<br>OR <input type="checkbox"/> Sigmoidoscopy OR <input type="checkbox"/> Colonoscopy<br><input type="checkbox"/> Audioscope (or inquire/whispered voice test)<br><input type="checkbox"/> Fasting Lipid Profile <sup>2</sup><br><input type="checkbox"/> Fasting Blood Glucose, at least q3 yrs (more often if at risk) <sup>3</sup><br><input type="checkbox"/> Bone Mineral Density, q1-2 years if abnormal, q2-3 years if normal <sup>1</sup> |
| Immunizations       | <input type="checkbox"/> Tetanus vaccine q10yr<br><input type="checkbox"/> Influenza vaccine q1yr<br><input type="checkbox"/> Varicella vaccine (2 doses) <input type="checkbox"/> Varicella Immunity<br><input type="checkbox"/> Pneumococcal vaccine (high risk) <sup>4</sup><br><input type="checkbox"/> Acellular pertussis vaccine <sup>4</sup>                                                                                                                                                                                        | <input type="checkbox"/> Tetanus vaccine q10yr<br><input type="checkbox"/> Influenza vaccine q1yr<br><input type="checkbox"/> Varicella vaccine (2 doses) <input type="checkbox"/> Varicella Immunity<br><input type="checkbox"/> Pneumococcal vaccine <sup>4</sup><br><input type="checkbox"/> Acellular pertussis vaccine <sup>4</sup>                                                                                                                                                                 |

**Assessment and Plans:**

\_\_\_\_\_

Date: \_\_\_\_\_

Signature: \_\_\_\_\_

**References**

- Unless otherwise stated, recommendations come from the Canadian Task Force on Preventive Health Care: *The Canadian Guide to Clinical Preventive Health Care*. Ottawa: Minister of Supply and Services Canada and <http://www.ctfphc.org/>
1. Scientific Advisory Board, Osteoporosis Society of Canada. Clinical practice guidelines for the diagnosis and management of osteoporosis. *CMAJ* 2002;167(10 suppl):S1-34.
  2. Working Group on Hypercholesterolemia and Other Dyslipidemias. Recommendations for the management and treatment of dyslipidemia and the prevention of cardiovascular disease: 2006 update. *Can J Cardiol* 2006;22(11) 913-927.
  3. Canadian Diabetes Association Clinical Practice Guidelines Expert Committee. Canadian Diabetes Assn 2003 Clinical Practice Guidelines for the Prevention and Management of Diabetes in Canada. *Can J Diabetes*. 2003;27 (Suppl 2).
  4. National Advisory Committee on Immunization. *Canadian Immunization Guide*, 7th edition. Ottawa: Minister of Public Works and Government Services Canada; 2006.
  5. Expert Working Group on Canadian Guidelines for STIs. *Canadian Guidelines on Sexually Transmitted Infections*, 2006 edition. Ottawa: Public Health Agency of Canada.

**Disclaimer:** This form is a guide to the adult periodic health examination. Last updated January 2007. The recommendations are for average-risk adults.

Endorsed by:

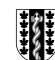

The College of Family Physicians of Canada

Le Collège des médecins de famille du Canada
